# Supplementary material
Source: publisher figshare collection journal article supplement (https://gsajournals.figshare.com/ndownloader/files/38912721)
Supplement: Supplementary file 1 [file 38912721]

## Sheet: Supplementary Table S1
Table S1. Sequence datasets used in this study. Total reads for Oxford Nanopore Technologies libraries are passed reads after base calling
Library Construction	Flow Cell Wash	Genotype	Source	Tissue	Library ID	BioSample	Total Reads
Oxford Nanopore Ligation Sequencing Kit, SQK-LSK109		DM1S1	DNA	leaf	Thilani_DM1S1_1	SAMN31207439	504489
Oxford Nanopore Ligation Sequencing Kit, SQK-LSK109		DM1S1	DNA	leaf	TJ_DM1S1_2	SAMN31207439	272664
Oxford Nanopore Ligation Sequencing Kit, SQK-LSK109		DM1S1	DNA	leaf	TJ_DM1S1_3	SAMN31207439	532584
Oxford Nanopore Ligation Sequencing Kit, SQK-LSK109	Flow Cell Wash Kit, EXP-WSH003	DM1S1	DNA	leaf	TJ_DM1S1_4	SAMN31207439	297107
Oxford Nanopore Ligation Sequencing Kit, SQK-LSK109		DM1S1	DNA	leaf	TJ_DM1S1_4_20200129	SAMN31207439	137350
Oxford Nanopore Ligation Sequencing Kit, SQK-LSK109	Flow Cell Wash Kit, EXP-WSH003	DM1S1	DNA	leaf	TJ_DM1S1_6	SAMN31207439	138443
Oxford Nanopore Ligation Sequencing Kit, SQK-LSK109	Flow Cell Wash Kit, EXP-WSH003	DM1S1	DNA	leaf	TJ_DM1S1_7	SAMN31207439	197377
Oxford Nanopore Ligation Sequencing Kit, SQK-LSK109		DM1S1	DNA	leaf	TJ_DM1S1_8	SAMN31207439	347598
Oxford Nanopore Ligation Sequencing Kit, SQK-LSK109		DM1S1	DNA	leaf	TJ_DM1S1_9	SAMN31207439	269294
Oxford Nanopore Ligation Sequencing Kit, SQK-LSK109	Flow Cell Wash Kit, EXP-WSH003	DM1S1	DNA	leaf	TJ_DM1S1_10	SAMN31207439	177191
Oxford Nanopore Ligation Sequencing Kit, SQK-LSK109	Flow Cell Wash Kit, EXP-WSH003	DM1S1	DNA	leaf	TJ_DM1S1_11	SAMN31207439	303500
Illumina TruSeq DNA Nano		DM1S1	DNA	leaf	DM1S1_AA	SAMN31207440	121582147
Illumina TruSeq DNA Nano		1S1	DNA	leaf	1S1_AA	SAMN31207441	237075905
Oxford Nanopore PCR-cDNA Sequencing Kit, SQK-PCS109		DM1S1	RNA	leaf	DM1S1_AC_01_ONT	SAMN31207442	10286298
Oxford Nanopore PCR-cDNA Sequencing Kit, SQK-PCS109		DM1S1	RNA	tuber	DM1S1_AD_01_ONT	SAMN31207443	5909668
Oxford Nanopore PCR-cDNA Sequencing Kit, SQK-PCS109		DM1S1	RNA	leaf	DM1S1_AE_01_ONT	SAMN31207442	15621746
Oxford Nanopore PCR-cDNA Sequencing Kit, SQK-PCS109		DM1S1	RNA	tuber	DM1S1_AF_01_ONT	SAMN31207443	12541435
